## REHABILITATION SECTION

### Original Research Article

# Efficacy and Safety of Tanezumab on Osteoarthritis Knee and Hip Pains: A Meta-Analysis of Randomized Controlled Trials

Junyuan Chen, MD,\* Jieruo Li, PhD,\* Ruobin Li, MD,<sup>†</sup> Huajun Wang, PhD,\* Jie Yang, MD,\* Jichun Xu, MD,\* and Zhengang Zha, PhD\*

Departments of \*Bone and Joint Surgery, and <sup>†</sup>Gynaecology and Obstetrics, The First Affiliated Hospital of Jinan University, Guangzhou, China

Correspondence to: Z.G. Zha, PhD, Department of Bone and Joint Surgery, The First Affiliated Hospital of Jinan University, 613 Huangpu Avenue West, Guangzhou, Guangdong, China. Tel: +86-20-3868-8559; E-mail: zhazg@vip.163.com.

Funding sources: Supported by China Postdoctoral Science Foundation (2015M582480), National Natural Science Foundation of China (81601219) and Natural Science Foundation of Guangdong Province (2016A030313100).

Conflict of interest: We have no conflicts of interest to declare.

Authors J.Y. Chen and J.R. Li contributed equally to this work.

### Abstract

**Objectives.** To evaluate the efficacy and safety of tanezumab for management of osteoarthritis (OA) knee and hip pain.

**Methods.** Articles about management of OA knee and hip pains by tanezumab were systematically searched in PubMed, EBSCO, EMBASE, ScienceDirect, Web of Science, OVID, and Cochrane Library from the available date of inception until January 2016. Randomized controlled trials (RCTs) comparing the efficacy and safety of tanezumab with placebo/active comparator for management of OA knee and hip pains were included, and those with confounding conditions were excluded. Study quality was

assessed using the Jadad five-point score. Finally, a meta-analysis of all eligible RCTs was performed on Review Manager 5.3 and STATA 12.0.

**Results.** Nine studies with 10 RCTs that enrolled 7,665 patients were included. The reductions in pain intensity are significantly different between tanezumab-treated patients and placebo-treated patients (5,879 patients, mean difference [MD] = -0.98, 95% confidence interval [CI] = -1.18– -0.79). Both functional improvement (6,078 patients, MD = -1.10, 95% CI = -1.28– -0.92) and Patient's Global Assessment (PGA; 5,366 patients, MD = -0.27, 95% CI = -0.34– -0.20) are significantly different. There are significantly more discontinued patients due to adverse events (AEs) after treatment with tanezumab (6,537 patients, risk ratio = 1.62, 95% CI = 1.29–2.03). However, differences in serious AEs are not significant. Moreover, tanezumab-treated patients suffer from significantly more paraesthesia, arthralgia, hypoaesthesia, and peripheral edema.

**Conclusions.** Tanezumab vs placebo provides superior pain relief and improvement in physical function and PGA in knee and hip osteoarthritis patients and is generally well tolerated with acceptable AEs. Low-dose tanezumab (10 or 25 µg/kg and 2.5 mg) provides similar effectiveness in reducing pain and improving function and is associated with fewer AEs. The long-term safety of tanezumab on osteoarthritis knee and hip pain needs further investigation.

**Key Words.** Tanezumab; Nerve Growth Factor; Osteoarthritis; Meta-Analysis; Randomized Controlled Trials

### Introduction

Osteoarthritis (OA) is the most common form of arthritis in older individuals and the leading cause of disability worldwide [1]. The incidence rate of OA among adults in the United States is about 12%, which is expected to increase over the coming years as the elderly population

booms [2]. Pain intensity is a better predictor of the OA-associated disability degree compared with radiographic severity of disease. As the leading symptom of OA, pain is often chronic, leading to significant morbidity and decreased quality of life. Thus, pain reduction and functional improvement are most important in the treatment of OA. Some guidelines recommend both nonpharmacological and pharmacological therapies for treatment of OA-related pain [3]. Pharmacological management, such as acetaminophen, nonsteroidal anti-inflammatory drugs (NSAIDs), and opioids, is commonly used for painful OA. However, reservations have been expressed concerning the long-term safety and efficacy of pharmacological management, which is associated with potential risks or side effects such as gastrointestinal bleeding, peptic ulcer disease, cardiovascular effects (due to NSAIDs), and overdose, misuse, or addiction (due to opioids) [4]. Potent analgesic medications that are well tolerated may help to avoid or delay surgical intervention.

Nerve growth factor (NGF) is a neurotrophin that regulates the structure and function of responsive sensory neurons, including small-diameter nociceptive afferents. It is recognized that NGF plays an important role in pain modulation via nociceptor sensitization [5,6]. Injury, inflammation, and chronic pain conditions are associated with the upregulation of NGF levels [7,8]. NGF levels also elevate in the joints of OA patients, suggesting that NGF also contributes to OA pain [9]. Tanezumab, a humanized IgG2 monoclonal antibody that selectively targets NGF, blocks the interaction of NGF with its receptors, the neurotrophic tropomyosin-related kinase A (trkA) receptor and the low-affinity NGF receptor p75(5). Several clinical randomized trials suggest that tanezumab is efficient in several distinct chronic pain conditions: interstitial cystitis [10], chronic low back pain [11], and OA [12,13].

Though prior studies established the superiority of tanezumab over placebo in the management of OA knee and hip pain, some reports describing the unexpected adverse events (AEs) initially described as osteonecrosis that required total joint replacement drove the US Food and Drug Administration (FDA) to impose a temporary partial clinical hold on tanezumab research for all indications except cancer pain on June 22, 2010. Until 2012, the FDA Arthritis Advisory Committee further endorsed clinical development of tanezumab by including additional measures to minimize risk and protect patient safety. To the best of our knowledge, there is no meta-analysis on the efficacy and safety of tanezumab on OA. Therefore, we performed a meta-analysis of all available randomized controlled trials (RCTs) to evaluate the efficacy and safety of tanezumab for treatment of OA knee and hip pain.

## Methods

### Search Strategy

Following the Preferred Reporting Items for Systematic Reviews and Meta-Analyses (PRISMA) guidelines, we conducted a comprehensive search of all relevant RCTs

through PubMed, EBSCO, EMBASE, ScienceDirect, Web of Science, OVID, and Cochrane Library using the following terms: “tanezumab,” “osteoarthritis,” or “degenerative arthritis.” All databases were searched from the available date of inception until the latest issue (January 2016). Only English publications were included. The references of retrieved articles were also examined to find other relevant articles.

### Inclusion Criteria

The inclusion criteria were as follows: 1) study design: RCT; 2) study population: patients with OA of knee or hip; 3) intervention: tanezumab vs placebo or active comparator; 4) outcome measurement: mean change from baseline to end point in Western Ontario and McMaster Universities Osteoarthritis Index (WOMAC) pain, WOMAC physical functional, and patient’s global assessment (PGA), discontinued due to AEs and serious AEs.

Patients included should be aged 18 years or older, have a body mass index of  $39 \text{ kg/m}^2$  or lower, have a diagnosis of knee or hip OA based on the American College of Rheumatology criteria and radiographic confirmation (Kellgren-Lawrence grade  $\geq 2$ , 0–4 scale), and be a candidate for invasive interventions such as intra-articular injections or total knee arthroplasty. Patients were also required to have a WOMAC pain subscale score in the index knee of 4 or higher (0–10 scale) at screening and 5 or higher at baseline, an increase of 1 or more after washout of prior analgesic treatment.

Patients were also excluded from the study if they were pregnant or intended to get pregnant during the study; or if they had any condition that could confound OA pain assessment, had rheumatoid arthritis, fibromyalgia, or other autoimmune disorders, or had significant cardiac, neurologic, or psychiatric conditions.

In individual studies, the patterns of efficacy (WOMAC pain subscale, WOMAC physical function subscale, and PGA) were obtained at baseline and at weeks 2, 4, 8, 16, 24, and even 32, or at early termination from the study. However, the mean baseline-to-end point changes of efficacy outcome measurement were used in this meta-analysis. For the event of inadequate pain relief, rescue medication was permitted, but it had to be discontinued at least 48 hours prior to any study visit.

### Data Extraction

Two authors (J.Y. Chen and R.B. Li) independently extracted data (study characteristics, quality criteria, participant characteristics, intervention details, outcome measures, baseline and postintervention results) using a structured form. If there were several papers coming from the same study, only the most recent or complete study was included. Any disagreements about data extraction and quality assessment between the two reviewers were resolved by consensus, or, if necessary, by a third reviewer (Z.G. Zha).

### Quality Assessment

All the studies were assessed independently using the Jadad five-point score for RCTs [14]. The Jadad score included method of randomization (0–2 points), double blinding (0–2 points), and description of withdrawals or dropouts (0–1 point). A study was assigned with 1) two points if it described the specific and appropriate method of randomization, 2) one point if the study was only described as randomized (only with terms such as “randomly,” “random,” or “randomization”) without concrete method, and 3) zero if the study did not mention the randomization. The Jadad score was also applied to blinding. The maximum score that could be awarded to a trial was five points. Studies with a Jadad score of 3 points or higher were regarded as high quality.

### Statistical Analysis

All statistical analyses were performed on Review Manager 5.3 (Cochrane Collaboration, Oxford, UK) and STATA 12.0 (Stata Corp LP, College Station, TX, USA). The continuous data for meta-analysis were expressed

as mean difference (MD) with 95% confidence interval (CI), while dichotomous data were presented as risk ratio (RR) with 95% CI. The heterogeneity across studies was estimated with chi-square test and the Higgins  $I^2$  test. If heterogeneity was at a  $P$  value greater than 0.10 or an  $I^2$  value of 50% or lower, a fixed-effects model was used; otherwise, a random-effects model was used. If a heterogeneity of  $I^2$  value greater than 70% was evident, the inferior study was eliminated from the meta-analysis. The overall effect was tested using a  $Z$ -score with significance set at a  $P$  value of less than 0.05. Publication bias was visually assessed with funnel plots and quantitatively assessed using Egger's regression tests.

## Results

### Study Selection

Figure 1 shows the PRISMA flow diagram of study selection. Of the 750 articles initially identified, we retained 39 articles for screening after reviewing titles and abstracts based on the inclusion criteria. After reviewing full texts, we excluded 30 studies. Nine studies with

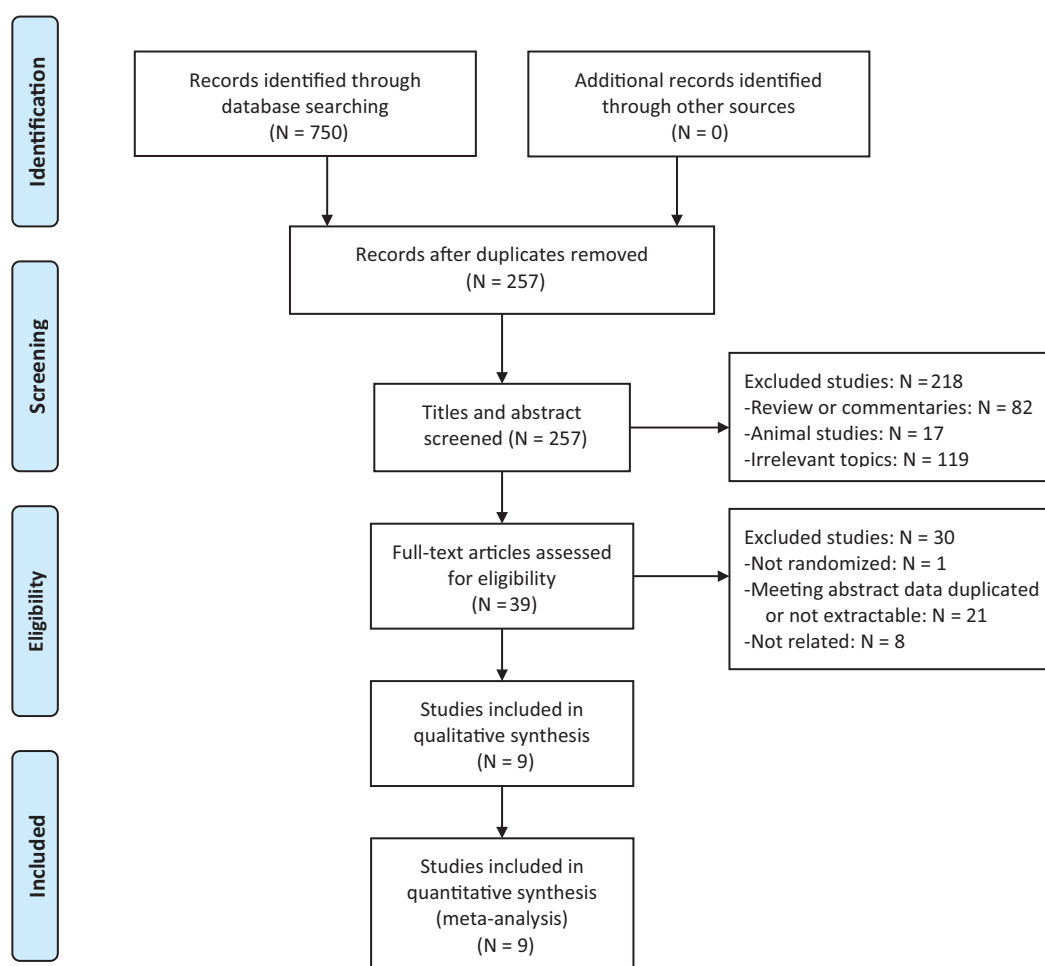

**Figure 1** The PRISMA flow diagram of study selection.

7,665 individuals were included in the meta-analysis. The total sample size was based on the intent-to-treat (ITT) population.

### Study Characteristics

The characteristics of the included studies are shown in Table 1, and details of the baseline patient characteristics are shown in Table 2. The nine included studies contain 10 RCTs (one study [13] contains two RCTs), which are all double-blind, parallel-group, placebo or active-controlled trials.

Most of the RCTs are phase III trials, and patients in the tanezumab dose receive 2.5/5/10 mg every eight weeks, while in two phase II trials [12,15] the tanezumab dose is 10–200 µg/kg. The pharmacokinetic/pharmacodynamic and dose-response analyses show that a dosing regimen adjusted for body weight provided negligible reduction in variability in systemic exposure over that predicted using a fixed-dose regimen [16]. As a result, the phase II and phase III data were pooled together. The doses of 10 and 25 µg/kg in phase II trials and 2.5 mg in phase III trials were combined as a low-dose subgroup; the doses of 50 µg/kg and 5 mg were combined as a moderate-dose subgroup; the doses of 100 and 200 µg/kg and 10 mg were combined as a high-dose subgroup. The efficacy data were analyzed in the low-dose, moderate-dose, and high-dose subgroups separately.

Balanescu et al. added tanezumab to oral diclofenac sustained release (DSR) in patients with hip or knee OA pain [17]. Ekman et al. compared intravenous tanezumab (5 or 10 mg) with placebo and naproxen (500 mg twice daily) [13], while another trial evaluated tanezumab monotherapy or combined with NSAIDs in the treatment of knee or hip OA pain [18].

Quality assessment of the included RCTs is presented in Table 3, with Jadad scores as well. All nine included studies were considered to be high quality, two studies were assessed as Jadad 3 point, three studies were assessed as Jadad 4 point, and four studies were assessed as Jadad 5 point. Publication bias was estimated via a funnel plot and a symmetric inverse funnel distribution was obtained. The Egger's regression tests also did not identify any evidence of publication bias among the included studies ( $P = 0.658$ ).

### Pain Intensity Reduction

All included RCTs evaluating the analgesic efficacy utilize WOMAC pain reduction as the primary or secondary outcome. The mean baseline-to-end point changes of WOMAC pain are summarized in Figure 2. All WOMAC pain scores were assessed using a numerical rating scale of 0–10, in which a decreasing score represents a reduction in pain intensity. WOMAC pain scores assessed on a 0–100 mm visual analogue scale in two RCTs [12,15] were converted to this numerical rating scale for analysis. The pain intensity reductions are significantly different between tanezumab-treated and placebo-treated patients (5,879 patients, MD = -0.98, 95% CI = -1.18– -0.79,  $P < 0.00001$ ) (Figure 2), suggesting tanezumab treatment is favorable for pain intensity reduction. These studies show a mild degree of heterogeneity ( $P = 0.40$ ,  $I^2 = 5\%$ ).

### Functional Improvement

All included trials provide specific relevant data for comprehensive analysis of WOMAC physical function. All WOMAC physical function scores were assessed using the numerical rating scale of 0–10, in which a lower score indicates less limitation of physical function.

**Table 1** Characteristics of included studies

| Study          | Design | Country | Patients, No. | Index joint  | Treatment period, wk | Coprimary end points                                                    |
|----------------|--------|---------|---------------|--------------|----------------------|-------------------------------------------------------------------------|
| Balanescu 2014 | RCT    | Rumania | 607           | Knee and hip | 24                   | WOMAC pain, WOMAC physical function, PGA                                |
| Brown 2012     | RCT    | America | 697           | Knee         | 32                   | WOMAC pain, WOMAC physical function, PGA                                |
| Brown 2013     | RCT    | America | 627           | Hip          | 32                   | WOMAC pain, WOMAC physical function, PGA                                |
| Brown 2014     | RCT    | America | 219           | Knee and hip | 32                   | Nerve conduction attributes, heart rate variability with deep breathing |
| Ekman 2014A    | RCT    | America | 828           | Knee         | 24                   | WOMAC pain, WOMAC physical function, PGA                                |
| Ekman 2014B    | RCT    | America | 840           | Knee and hip | 24                   | WOMAC pain, WOMAC physical function, PGA                                |
| Lane 2010      | RCT    | America | 450           | Knee         | 26                   | Knee pain while walking, PGA of response to therapy                     |
| Nagashima 2011 | RCT    | Japan   | 83            | Knee         | 13-17                | Index knee pain intensity, WOMAC subscales                              |
| Schnitzer 2015 | RCT    | America | 2,700         | Knee and hip | 16                   | WOMAC pain, WOMAC physical function, PGA                                |
| Spierings 2013 | RCT    | America | 614           | Knee and hip | 16                   | WOMAC pain                                                              |

PGA = patient's global assessment; RCT = randomized controlled trial; WOMAC = Western Ontario and McMaster Universities Osteoarthritis Index.

**Table 2** Baseline patient characteristics

| Study          | Group                          | N   | Female<br>gender, % | Age, y | Kellgren-Lawrence grade, % |       |      | Duration since<br>diagnosis, y |
|----------------|--------------------------------|-----|---------------------|--------|----------------------------|-------|------|--------------------------------|
|                |                                |     |                     |        | 2                          | 3     | 4    |                                |
| Balanesu 2014  | Tan 2.5 mg + DSR 75 mg         | 157 | 77.1                | 62.1   | 49.0                       | 43.3  | 7.6  | 6.1                            |
|                | Tan 5mg + DSR 75 mg            | 150 | 73.3                | 62.2   | 42.7                       | 47.3  | 10.0 | 6.7                            |
|                | Tan 10 mg + DSR 75 mg          | 145 | 82.8                | 63.1   | 50.3                       | 42.8  | 6.9  | 6.6                            |
|                | Placebo + DSR 75 mg            | 152 | 77.6                | 62.3   | 44.7                       | 44.7  | 10.5 | 6.1                            |
| Brown 2012     | Tan 2.5 mg                     | 172 | 54.7                | 60.8   | 37.2                       | 43.0  | 18.0 | 7.3                            |
|                | Tan 5 mg                       | 172 | 58.7                | 62.1   | 37.2                       | 51.7  | 10.5 | 7.5                            |
|                | Tan 10 mg                      | 174 | 60.9                | 61.4   | 40.8                       | 44.3  | 14.9 | 9.5                            |
|                | Placebo                        | 172 | 69.2                | 62.2   | 39.5                       | 47.7  | 12.8 | 8.2                            |
| Brown 2013     | Tan 2.5 mg                     | 155 | 65.2                | 62.4   | 45.8                       | 34.2  | 20.0 | 6.0                            |
|                | Tan 5 mg                       | 154 | 59.7                | 61.8   | 46.8                       | 35.1  | 17.5 | 6.3                            |
|                | Tan 10 mg                      | 157 | 56.1                | 61.8   | 42.7                       | 36.9  | 20.4 | 5.6                            |
|                | Placebo                        | 155 | 66.5                | 61.9   | 47.1                       | 36.1  | 16.8 | 5.6                            |
| Brown 2014     | Tan 5 mg                       | 73  | 60.3                | 57.8   | 34.2                       | 24.7  | 15.1 | NA                             |
|                | Tan 10 mg                      | 74  | 63.5                | 58.0   | 29.7                       | 35.1  | 13.5 | NA                             |
|                | Placebo                        | 72  | 54.2                | 56.3   | 43.1                       | 27.8  | 11.1 | NA                             |
| Ekman 2014 A   | Tan 5 mg                       | 206 | 59.2                | 61.1   | 36.9                       | 52.4  | 10.7 | 7.9                            |
|                | Tan 10 mg                      | 208 | 61.5                | 61.1   | 47.1                       | 43.3  | 9.6  | 8.5                            |
|                | Naproxen 500 mg                | 206 | 62.6                | 61.4   | 48.1                       | 43.2  | 8.7  | 7.2                            |
|                | Placebo                        | 208 | 57.7                | 60.9   | 42.8                       | 43.8  | 13.5 | 9.2                            |
| Ekman 2014 B   | Tan 5 mg                       | 211 | 63.5                | 59.8   | 49.3                       | 36.5  | 14.2 | 6.4                            |
|                | Tan 10 mg                      | 209 | 61.2                | 59.2   | 48.3                       | 34.4  | 17.2 | 6.8                            |
|                | Naproxen 500 mg                | 211 | 61.2                | 60.3   | 48.3                       | 39.8  | 8.1  | 7.7                            |
|                | Placebo                        | 209 | 65.1                | 60.1   | 51.2                       | 37.8  | 10.5 | 6.3                            |
| Lane 2010      | Tan 10 µg/kg                   | 74  | 66.2                | 58.3   | 28.8                       | 71.2* |      | NA                             |
|                | Tan 25 µg/kg                   | 74  | 67.6                | 59.9   | 31.1                       | 68.9* |      | NA                             |
|                | Tan 50 µg/kg                   | 74  | 50.0                | 60.4   | 39.2                       | 60.8* |      | NA                             |
|                | Tan 100 µg/kg                  | 74  | 69.5                | 57.1   | 29.7                       | 69.3* |      | NA                             |
|                | Tan 200 µg/kg                  | 74  | 54.1                | 58.4   | 26.0                       | 74.0* |      | NA                             |
|                | Placebo                        | 74  | 56.8                | 58.1   | 24.7                       | 75.3* |      | NA                             |
| Nagashima 2011 | Tan 10 µg/kg                   | 15  | 66.7                | 59.3   | 46.7                       | 53.3  | 0    | 4.5                            |
|                | Tan 25 µg/kg                   | 15  | 53.3                | 57.3   | 60.0                       | 40.0  | 0    | 7.3                            |
|                | Tan 50 µg/kg                   | 15  | 73.3                | 60.7   | 93.3                       | 6.7   | 0    | 4.2                            |
|                | Tan 100 µg/kg                  | 16  | 75.0                | 58.1   | 68.8                       | 31.3  | 0    | 3.8                            |
|                | Tan 200 µg/kg                  | 6   | 83.3                | 60.0   | 50.0                       | 50.0  | 0    | 5.4                            |
|                | Placebo                        | 16  | 68.8                | 59.4   | 50.0                       | 43.8  | 6.3  | 7.9                            |
| Schnitzer 2015 | Tan 5 mg                       | 541 | 72.5                | 61.9   | 33.5                       | 35.3  | 31.2 | 7.3                            |
|                | Tan 10 mg                      | 542 | 72.3                | 62.0   | 34.5                       | 37.5  | 28.0 | 7.1                            |
|                | Tan 5 mg + NSAID <sup>†</sup>  | 536 | 67.7                | 61.7   | 34.2                       | 39.6  | 26.0 | 7.0                            |
|                | Tan 10 mg + NSAID <sup>†</sup> | 542 | 68.1                | 61.3   | 29.7                       | 40.2  | 30.1 | 7.4                            |
|                | Placebo + NSAID <sup>†</sup>   | 539 | 72.0                | 61.3   | 36.5                       | 40.3  | 23.2 | 7.5                            |
| Spierings 2013 | Tan 5 mg                       | 161 | 59.6                | 57.8   | 48.4                       | 37.3  | 14.3 | 7.6                            |
|                | Tan 10 mg                      | 150 | 62.7                | 57.0   | 48.7                       | 36.7  | 14.7 | 7.5                            |
|                | Oxycodone 10–40 mg             | 158 | 62.7                | 57.6   | 50.6                       | 34.8  | 14.6 | 6.2                            |
|                | Placebo                        | 141 | 65.2                | 57.2   | 47.5                       | 39.7  | 12.8 | 7.4                            |

DSR = diclofenac sustained release; NA = data not available; Tan = tanezumab.

\*Kellgren-Lawrence grade 3 or 4.

<sup>†</sup>Naproxen 500 mg or celecoxib 100 mg.

The WOMAC physical function scores are significantly different between the tanezumab-treated and placebo-treated patients (6,078 patients, MD = -1.10, 95% CI =

-1.28– -0.92,  $P < 0.00001$ ) (Figure 3). These studies show a mild degree of heterogeneity ( $P = 0.25$ ,  $I^2 = 15\%$ ).



**Table 3** Quality assessment of included RCTs

| Study          | Randomization | Double-blinding | Withdrawals and dropouts | Jadad score |
|----------------|---------------|-----------------|--------------------------|-------------|
| Balanescu 2014 | 2             | 2               | 1                        | 5           |
| Brown 2012     | 1             | 2               | 1                        | 4           |
| Brown 2013     | 1             | 1               | 1                        | 3           |
| Brown 2014     | 2             | 2               | 1                        | 5           |
| Ekman 2014 A/B | 1             | 1               | 1                        | 3           |
| Lane 2010      | 2             | 2               | 1                        | 5           |
| Nagashima 2011 | 2             | 2               | 1                        | 5           |
| Schnitzer 2015 | 2             | 1               | 1                        | 4           |
| Spierings 2013 | 1             | 2               | 1                        | 4           |

RCT = randomized controlled trial.

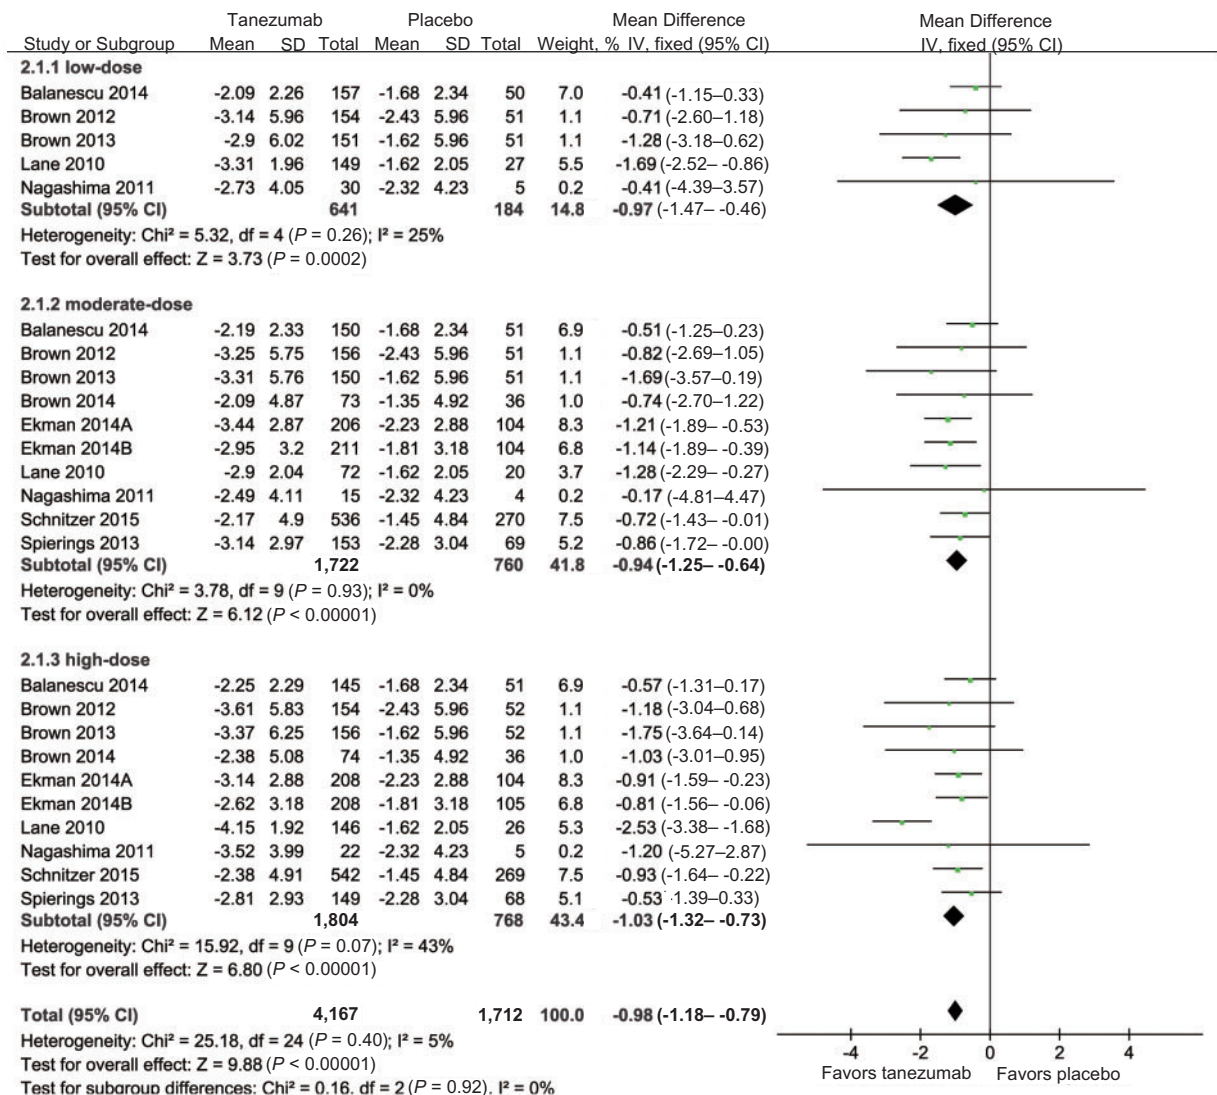**Figure 2** Forest plots of mean baseline-to-end point change in Western Ontario and McMaster Universities Osteoarthritis Index pain after tanezumab treatment vs placebo (mean  $\pm$  SD).

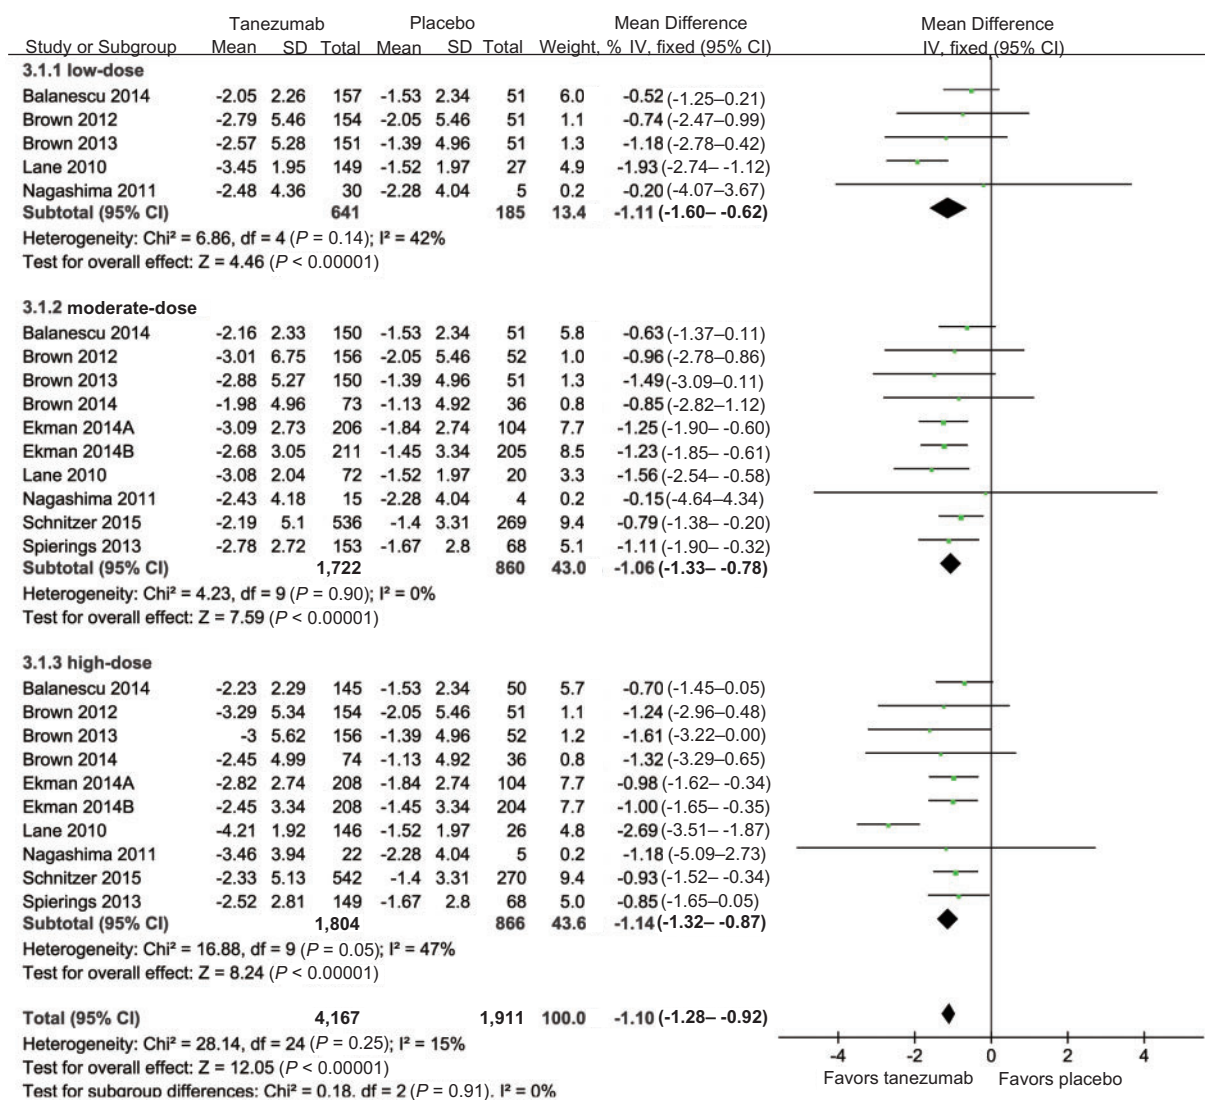

**Figure 3** Forest plots of mean baseline-to-end point change in Western Ontario and McMaster Universities Osteoarthritis Index (WOMAC) physical function after tanezumab treatment vs placebo (mean  $\pm$  SD).

### Patient's Global Assessment

Nine of the 10 trials report data of patient's global assessment (PGA). PGA of OA was assessed using a five-point Likert scale (where 1 = very good and 5 = very poor). The reduction of PGA scores is significantly larger in the tanezumab-treated vs placebo-treated patients (5,366 patients, MD = -0.27, 95% CI = -0.34– -0.20,  $P < 0.00001$ ) (Figure 4). No significant heterogeneity was observed between studies ( $P = 0.99$ ,  $I^2 = 0\%$ ).

### Safety

All included RCTs provide specific data for comprehensive analysis of discontinuity due to AEs and serious AEs. Serious AEs were defined as adverse events such

as life-threatening or disabling events resulting in hospitalization or death or resulting in a congenital anomaly or birth defect. The number of discontinued patients due to AEs is significantly larger after tanezumab vs placebo treatment (6,537 patients, RR = 1.62, 95% CI = 1.29–2.03,  $P < 0.0001$ ) (Figure 5). However, the occurrence rates of serious AEs is not significantly different between tanezumab-treated and placebo-treated patients (7,481 patients, RR = 1.19, 95% CI = 0.94–1.52,  $P = 0.15$ ) (Figure 6). The most frequent AEs reported in 10 trials are summarized in Table 4. Tanezumab-treated patients suffered significantly more paraesthesia, arthralgia, hypoaesthesia, and peripheral edema. In total, 10 deaths were reported in five studies [13,17–20], but none of the deaths was considered by investigators to be related to medication.

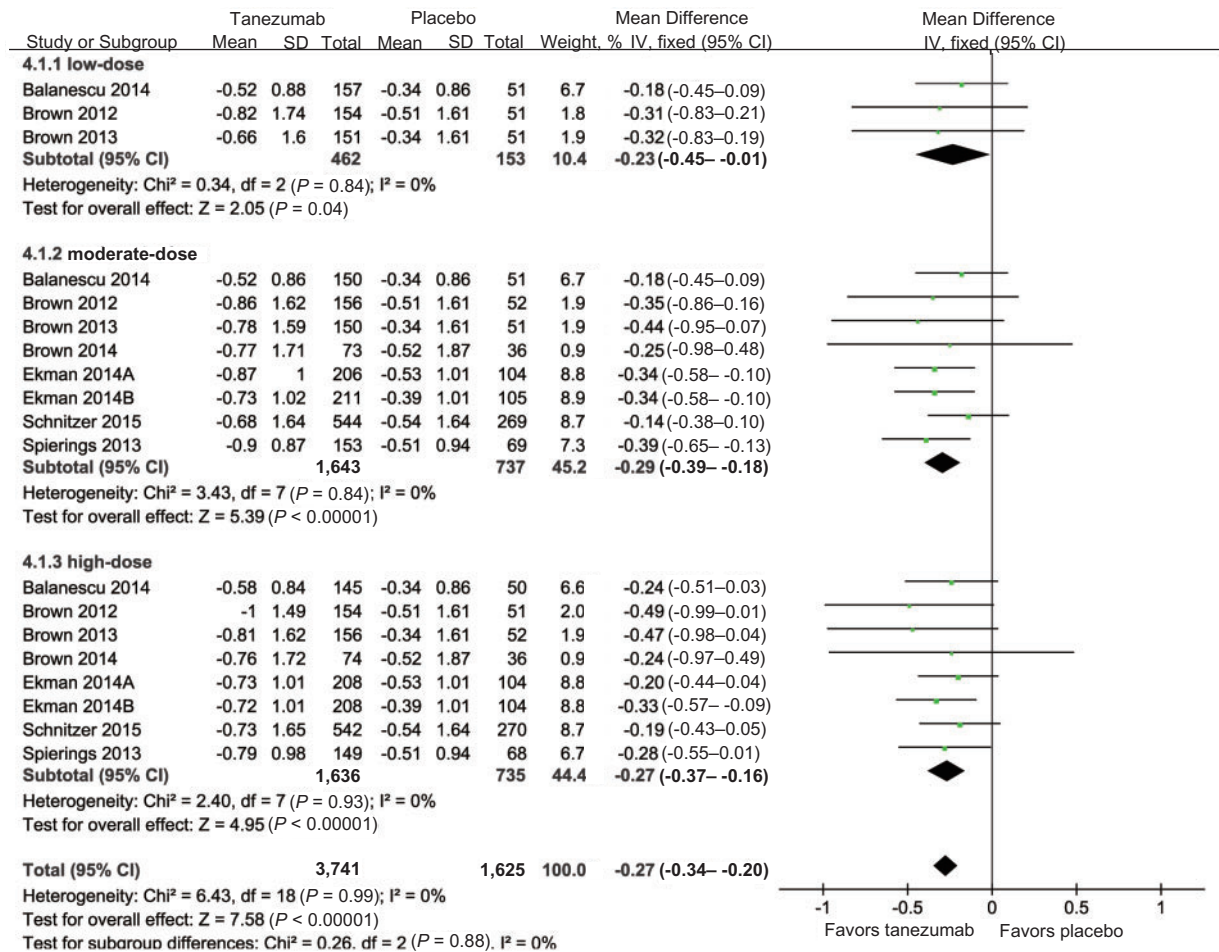

**Figure 4** Forest plots of mean baseline-to-end point change in patient's global assessment (PGA) after tanezumab treatment vs placebo (mean  $\pm$  SD).

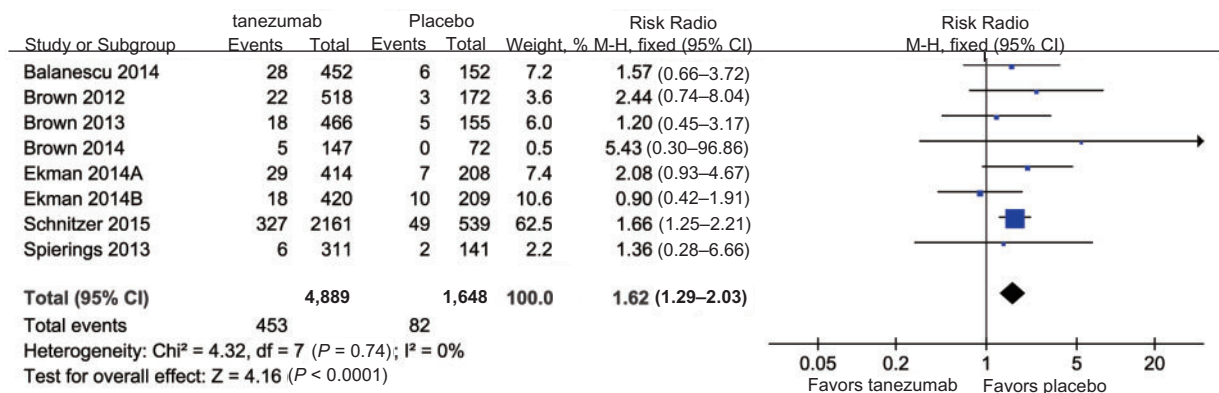

**Figure 5** Forest plots: number of discontinuities due to adverse events after tanezumab treatment vs placebo.



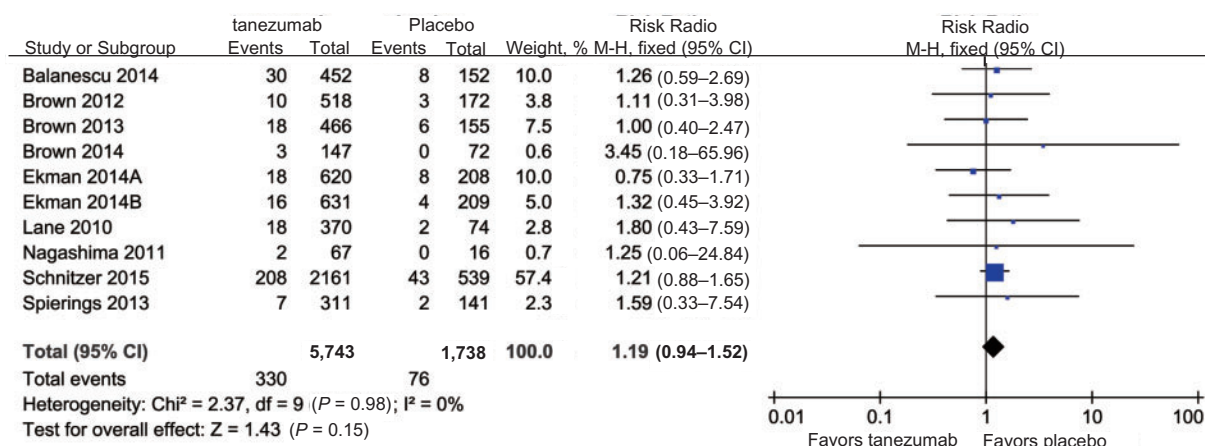

**Figure 6** Forest plots: number of serious adverse events after tanezumab treatment vs placebo.

**Table 4** Meta-analysis of most frequent adverse events after tanezumab or placebo treatment in OA patients

| Adverse event                     | No. of included studies | Patients with AEs/total |          | RR (95% CI)      | P        | P <sub>heterogeneity</sub> |
|-----------------------------------|-------------------------|-------------------------|----------|------------------|----------|----------------------------|
|                                   |                         | Tanezumab               | Placebo  |                  |          |                            |
| Paraesthesia                      | 10                      | 356/5,901               | 40/1,738 | 2.55 (1.85–3.51) | <0.00001 | 0.80                       |
| Headache                          | 10                      | 261/5,901               | 80/1,738 | 0.94 (0.73–1.20) | 0.60     | 0.40                       |
| Arthralgia                        | 9                       | 494/5,834               | 88/1,722 | 1.59 (1.28–1.98) | <0.0001  | 0.53                       |
| Hypoaesthesia                     | 9                       | 229/5,834               | 24/1,722 | 2.55 (1.70–3.83) | <0.00001 | 0.86                       |
| Hyperesthesia                     | 8                       | 33/3,673                | 1/1,183  | 2.49 (0.93–6.66) | 0.07     | 0.99                       |
| Peripheral edema                  | 7                       | 272/5,218               | 20/1,509 | 3.65 (2.35–5.68) | <0.00001 | 0.72                       |
| Peripheral neuropathy             | 7                       | 16/3,303                | 1/1,109  | 1.64 (0.56–4.81) | 0.37     | 1.00                       |
| Upper respiratory tract infection | 7                       | 214/4,913               | 56/1,429 | 1.08 (0.81–1.44) | 0.61     | 0.08                       |
| Urinary tract infection           | 6                       | 189/4,848               | 47/1,435 | 1.14 (0.83–1.56) | 0.41     | 0.43                       |

AE = adverse event; CI = confidence interval; OA = osteoarthritis; RR = risk ratio.

### Sensitivity Analyses

In order to explore the impact of a single study on the main outcomes, we performed a “one study removed” analysis by re-estimating the meta-analysis after removing one study at a time for each main outcome. Sensitivity analysis showed that heterogeneity in low-dose and high-dose groups for WOMAC pain and physical function were decreased greatly by removing Lane et al. [12], but the pooled result was unchanged. One reason for this is that the tanezumab dose in Lane et al. [12] was dependent upon weight. In this meta-analysis, the doses of 10 and 25 µg/kg and 2.5 mg were combined as a low-dose subgroup, while the doses of 100 and 200 µg/kg and 10 mg were combined as a high-dose subgroup.

### Discussion

The analgesic efficacy of tanezumab, a humanized monoclonal antibody, is concerned with its ability to

block NGF by interacting with its receptors TrkA and p75 in the peripheral nervous system. Previous preclinical studies indicate that tanezumab or its murine precursor can reduce pain intensity in a mouse model of bone cancer pain and fracture pain [21] and in a rat model of inflammatory arthritis pain [22].

The efficacy of tanezumab as an analgesic for OA knee and hip pains was evaluated in 10 placebo-controlled RCTs involving 7,665 patients. Tanezumab treatment at all three doses was superior to placebo treatment at all three coprimary endpoints, including measures of reduction in pain intensity, function improvement, and PGA of OA. In individual studies, higher doses tanezumab apparently have greater efficacy but are also associated with a higher likelihood of AEs [19,20]. However, we found that the magnitudes of effect are generally similar for low-, moderate-, and high-dose tanezumab vs placebo across all three coprimary endpoints. The low doses tanezumab (10 and 25 µg/kg and 2.5 mg) provide similar effectiveness in reducing pain and

improving function and are associated with fewer AEs. Specifically, significant and rapid improvement in pain was observed among tanezumab-treated patients after one week and remained significant throughout the remainder of the study [12,23].

As reported, tanezumab vs oxycodone provides significant improvement in WOMAC pain, physical function, and PGA of OA at week 8, with fewer AEs [23]. After comparing efficacy and long-term safety of tanezumab with naproxen and celecoxib, Ekmans et al. and Schnitzer et al. found that subjects receiving partial symptomatic relief of OA pain with NSAIDs may benefit more from tanezumab monotherapy [13,18]. According to a long-term open-label study, repeated tanezumab injections (administered at an eight-week interval and up to a total of eight infusions) in patients with moderate-to-severe knee OA provide continued pain relief and functional improvement with a low incidence of side effects [24]. A systematic review demonstrates that treatment with anti-NGF antibodies (including tanezumab, fulranumab, and fasinumab) provides efficacy in OA of knee and hip pain, and lower doses of tanezumab (2.5 and 5 mg) are associated with fewer AEs leading to study withdrawal, compared with the 10 mg dose, without significant difference in efficacy [25].

Overall, the rates of discontinuation due to AEs and serious AEs after tanezumab treatment are low, indicating that tanezumab is safe and generally well tolerated. Meta-analysis shows that tanezumab-treated patients suffered significantly more paraesthesia, arthralgia, hypoesthesia, and peripheral edema. The majority of AEs reported by tanezumab-treated patients, including abnormal peripheral sensations, are mild to moderate in severity and transitory without persistent changes in neurological examinations, and most resolve before study completion [12,23]. The IgG used to inhibit NGF is not expected to cross the blood-brain barrier under normal circumstances, making it unlikely that there would be AEs due to anti-NGF in the central nervous system [26]. In clinical study, there were no significant differences in memory function by HVLt-R between tanezumab and placebo groups, and the AEs of abnormal peripheral sensation also suggest that the effects of tanezumab are limited to the peripheral nervous system. The incidences of most neurologic AEs occurred with the first dose of tanezumab but were rarely observed with subsequent doses, except hypoesthesia and paresthesia, which occurred at different time points and were not predictable [19]. One study focused on nerve safety of tanezumab indicates that 5 or 10 mg tanezumab every eight weeks is not associated with structural neurotoxic effects on large motor or sensory nerves, autonomic nerves, or cutaneous small sensory fibers when used to treat chronic pain in individuals without known peripheral neuropathy [27]. Moreover, no significant differences were identified in blood, urine, electrocardiogram, blood pressure assessments, or other laboratory. Tanezumab treatment does not seem to

adversely affect gastrointestinal, cardiovascular, liver, or kidney function [13,18].

It should be mentioned that the FDA imposed a partial clinical hold on noncancer pain-related tanezumab studies due to unexpected AEs initially reported as osteonecrosis that required total joint replacement from June 2010 to August 2012. A blinded adjudication committee reviewed events in 249 patients with an investigator-reported adverse events of osteonecrosis and/or total joint replacements (TJRs). Only two events were adjudicated as primary osteonecrosis, while 68 events were adjudicated as rapid progression of OA (RPOA) [28]. Tanezumab treatment did not increase the risk of osteonecrosis but was associated with an increase in RPOA. Time to event analysis of RPOA in the phase III tanezumab studies depicted that RPOA was related to the dose of tanezumab administered as monotherapy; combination treatment of 10 mg tanezumab with an NSAID was associated with the highest estimated rate of RPOA. The risk factors for rapid progression of OA include higher doses of tanezumab ( $\geq 10$  mg), tanezumab combined with NSAIDs, and preexisting subchondral insufficiency fractures [28,29]. Although addition of tanezumab to stable NSAIDs provides clinically meaningful and significant improvements in OA pains, further investigations of tanezumab monotherapy for OA pain treatment are required.

In this meta-analysis, we found that tanezumab vs placebo provides superior pain relief and improvement in physical function in osteoarthritis patients, with acceptable AEs. The low doses of tanezumab provide similar effect and lead to fewer AEs compared with moderate and high doses. As we found that tanezumab is efficacious and safe, this work can be an important reference to policy-making. For example, the addition of the drug to the relevant guidelines as a first-line treatment for OA may be considered.

The 10 included RCTs are all double-blind and high quality (Figure 3). The results of these analyses may be scientifically and clinically important. However, this meta-analysis has several limitations. First, the search strategy does not cover unpublished trials, which might result in selection bias as trials with positive results are more likely to be included. Second, the language is restricted to English, so trials reported in other languages may be missed. Third, all included trials were sponsored by pharmaceutical companies, but this is a known potential source of bias.

## Conclusions

Tanezumab vs placebo provides superior pain relief and improvement in physical function and patient's global assessment in knee and hip osteoarthritis patients and is generally well tolerated with acceptable adverse events, such as paraesthesia, arthralgia, hypoesthesia, and peripheral edema. Low-dose tanezumab (10 and 25 µg/kg and 2.5 mg) provides similar effectiveness in reducing pain

and improving function and is associated with fewer AEs. The long-term safety of tanezumab on osteoarthritis knee and hip pain needs further investigation.

## References

- 1 Hunter DJ, Felson DT. Osteoarthritis. *BMJ* 2006;332: 639–42.
- 2 Lawrence RC, Felson DT, Helmick CG, et al. Estimates of the prevalence of arthritis and other rheumatic conditions in the United States. Part II. *Arthritis Rheum* 2008;58:26–35.
- 3 McAlindon TE, Bannuru RR, Sullivan MC, et al. OARSI guidelines for the non-surgical management of knee osteoarthritis. *Osteoarthritis Cartilage* 2014;22:363–88.
- 4 Whelton A. Renal and related cardiovascular effects of conventional and COX-2-specific NSAIDs and non-NSAID analgesics. *Am J Ther* 2000;7:63–74.
- 5 Abdiche YN, Malashock DS, Pons J. Probing the binding mechanism and affinity of tanezumab, a recombinant humanized anti-NGF monoclonal antibody, using a repertoire of biosensors. *Protein Sci* 2008;17:1326–35.
- 6 Hefti FF, Rosenthal A, Walicke PA, et al. Novel class of pain drugs based on antagonism of NGF. *Trends Pharmacol Sci* 2006;27:85–91.
- 7 Frade JM, Barde YA. Nerve growth factor: Two receptors, multiple functions. *BioEssays* 1998;20: 137–45.
- 8 Watson JJ, Allen SJ, Dawbarn D. Targeting nerve growth factor in pain: What is the therapeutic potential? *BioDrugs* 2008;22:349–59.
- 9 Walsh DA, McWilliams DF, Turley MJ, et al. Angiogenesis and nerve growth factor at the osteochondral junction in rheumatoid arthritis and osteoarthritis. *Rheumatology* 2010;49:1852–61.
- 10 Evans RJ, Moldwin RM, Cossons N, et al. Proof of concept trial of tanezumab for the treatment of symptoms associated with interstitial cystitis. *J Urol* 2011;185:1716–21.
- 11 Gimbel JS, Kivitz AJ, Bramson C, et al. Long-term safety and effectiveness of tanezumab as treatment for chronic low back pain. *Pain* 2014;155: 1793–801.
- 12 Lane NE, Schnitzer TJ, Birbara CA, et al. Tanezumab for the treatment of pain from osteoarthritis of the knee. *N Engl J Med* 2010;363: 1521–31.
- 13 Ekman EF, Gimbel JS, Bello AE, et al. Efficacy and safety of intravenous tanezumab for the symptomatic treatment of osteoarthritis: 2 randomized controlled trials versus naproxen. *J Rheumatol* 2014;41:2249–59.
- 14 Jadad AR, Moore RA, Carroll D, et al. Assessing the quality of reports of randomized clinical trials: Is blinding necessary? *Control Clin Trials* 1996;17: 1–12.
- 15 Nagashima H, Suzuki M, Araki S, Yamabe T, Muto C. Preliminary assessment of the safety and efficacy of tanezumab in Japanese patients with moderate to severe osteoarthritis of the knee: A randomized, double-blind, dose-escalation, placebo-controlled study. *Osteoarthritis Cartilage* 2011;19:1405–12.
- 16 Niclas Jonsson E, Xie R, Marshall SF, Arends RH. Population pharmacokinetics of tanezumab in phase 3 clinical trials for osteoarthritis pain. *Br J Clin Pharmacol* 2016;81:688–99.
- 17 Balanescu AR, Feist E, Wolfram G, et al. Efficacy and safety of tanezumab added on to diclofenac sustained release in patients with knee or hip osteoarthritis: A double-blind, placebo-controlled, parallel-group, multicentre phase III randomised clinical trial. *Ann Rheum Dis* 2014;73:1665–72.
- 18 Schnitzer TJ, Ekman EF, Spierings ELH, et al. Efficacy and safety of tanezumab monotherapy or combined with non-steroidal anti-inflammatory drugs in the treatment of knee or hip osteoarthritis pain. *Ann Rheum Dis* 2015;74:1202–11.
- 19 Brown MT, Murphy FT, Radin DM, et al. Tanezumab reduces osteoarthritic knee pain: Results of a randomized, double-blind, placebo-controlled phase III trial. *J Pain* 2012;13:790–8.
- 20 Brown MT, Murphy FT, Radin DM, et al. Tanezumab reduces osteoarthritic hip pain: Results of a randomized, double-blind, placebo-controlled phase III trial. *Arthritis Rheum* 2013;65:1795–803.
- 21 Koewler NJ, Freeman KT, Buus RJ, et al. Effects of a monoclonal antibody raised against nerve growth factor on skeletal pain and bone healing after fracture of the C57BL/6J mouse femur. *J Bone Miner Res* 2007;22:1732–42.
- 22 Shelton DL, Zeller J, Ho WH, Pons J, Rosenthal A. Nerve growth factor mediates hyperalgesia and cachexia in auto-immune arthritis. *Pain* 2005;116: 8–16.

- 23 Spierings EL, Fidelholtz J, Wolfram G, et al. A phase III placebo- and oxycodone-controlled study of tanezumab in adults with osteoarthritis pain of the hip or knee. *Pain* 2013;154:1603–12.
- 24 Schnitzer TJ, Lane NE, Birbara C, et al. Long-term open-label study of tanezumab for moderate to severe osteoarthritic knee pain. *Osteoarthr Cartil Osteoarthr Res Soc* 2011;19:639–46.
- 25 Schnitzer TJ, Marks JA. A systematic review of the efficacy and general safety of antibodies to NGF in the treatment of OA of the hip or knee. *Osteoarthr Cartil Osteoarthr Res Soc* 2015;23(suppl 1):S8–17.
- 26 Halvorson KG, Kubota K, Sevcik MA, et al. A blocking antibody to nerve growth factor attenuates skeletal pain induced by prostate tumor cells growing in bone. *Cancer Res* 2005;65:9426–35.
- 27 Brown MT, Herrmann DN, Goldstein M, et al. Nerve safety of tanezumab, a nerve growth factor inhibitor for pain treatment. *J Neurol Sci* 2014;345:139–47.
- 28 Hochberg MC, Tive LA, Abramson SB, et al. When is osteonecrosis not osteonecrosis?: Adjudication of reported serious adverse joint events in the tanezumab clinical development program. *Arthr Rheumatol* 2016;68:382–91.
- 29 Teichtahl AJ, Cicuttini FM. Editorial: Pain relief in osteoarthritis: The potential for a perfect storm. *Arthr Rheumatol* 2016;68:270–3.
